# Supplementary material
Source: PubMed Central journal article supplement (PMC4309368)
Supplement: NIHMS616438-supplement-Supplementary_Information.pdf [file NIHMS616438-supplement-Supplementary_Information.pdf]

| <b>Temperature</b> | <b>Strain/Treatment</b>      | <b>Median Survival (days)</b> | <b>n (censored)</b> | <b>Log- rank p-value (compared to control)</b> |
|--------------------|------------------------------|-------------------------------|---------------------|------------------------------------------------|
|                    | <b>Experiment #1 (+FUdR)</b> |                               |                     |                                                |
| 20°C               | N2 control                   | 16                            | 42 (38)             |                                                |
|                    | N2 10mM MnCl <sub>2</sub>    | 16                            | 81 (0)              | 0.0118                                         |
|                    | N2 20mM MnCl <sub>2</sub>    | 9                             | 47 (33)             | <0.0001                                        |
|                    | N2 30mM MnCl <sub>2</sub>    | 2                             | 47 (33)             | <0.0001                                        |
|                    | <b>Experiment #2 (+FUdR)</b> |                               |                     |                                                |
| 20°C               | N2 control                   | 14                            | 78 (2)              |                                                |
|                    | N2 10mM MnCl <sub>2</sub>    | 16                            | 57 (23)             | 0.4035                                         |
|                    | N2 20mM MnCl <sub>2</sub>    | 7                             | 62 (18)             | <0.0001                                        |
|                    | N2 30mM MnCl <sub>2</sub>    | 3                             | 66 (14)             | <0.0001                                        |
|                    | <b>Experiment #3 (+FUdR)</b> |                               |                     |                                                |
| 20°C               | N2 control                   | 18                            | 69 (11)             |                                                |
|                    | N2 10mM MnCl <sub>2</sub>    | 18                            | 77 (3)              | 0.9496                                         |
|                    | N2 20mM MnCl <sub>2</sub>    | 7                             | 64 (16)             | <0.0001                                        |
|                    | N2 30mM MnCl <sub>2</sub>    | 3                             | 56 (24)             | <0.0001                                        |
