# Supplementary material
Source: PubMed Central journal article supplement (PMC4309368)

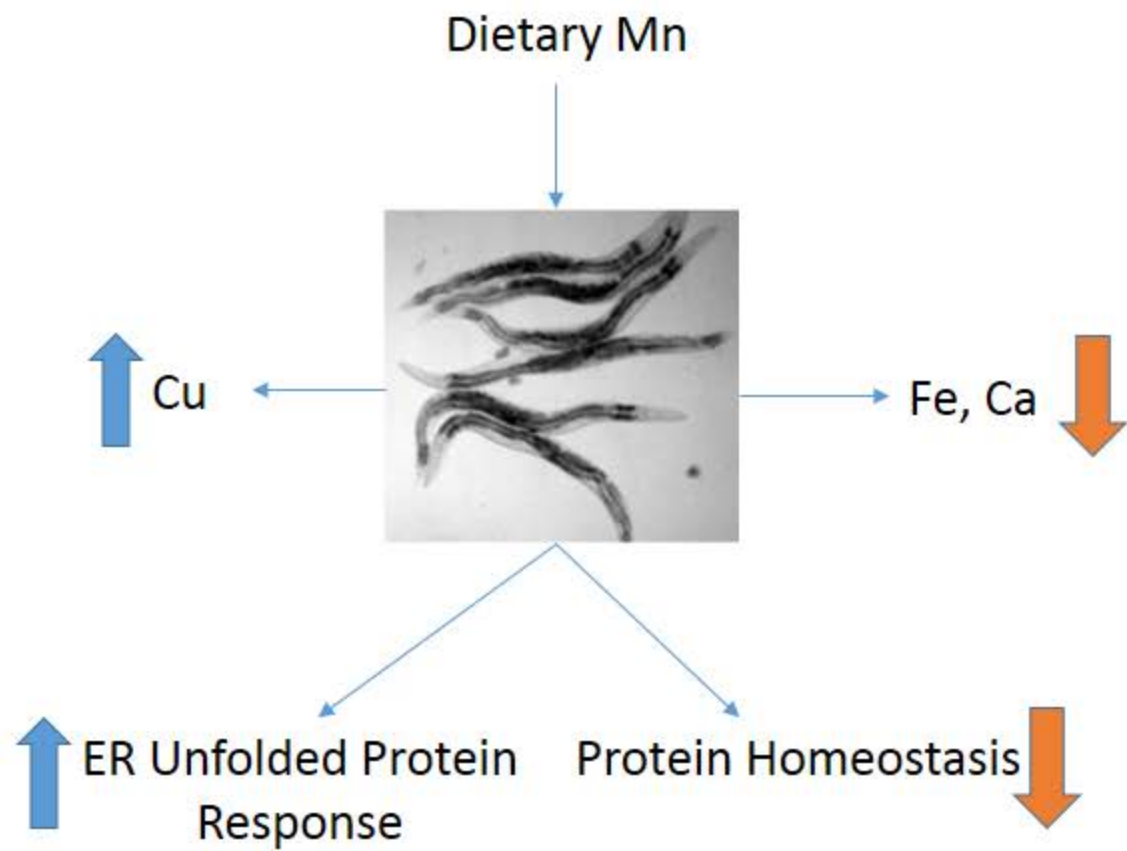

Supplement: NIHMS616438-supplement-Graphical_Abstract.pdf [file NIHMS616438-supplement-Graphical_Abstract.pdf]
